# Supplementary material for: Tunable afterglow luminescence and triple-mode emissions of thermally activated carbon dots confined within nanoclays
Source: Royal Society of Chemistry journal article supplement (doi:10.1039/c9tc04863d), 2019-01-01
Supplement: c9tc04863d1.pdf [file c9tc04863d1.pdf]

## Supporting Information

### **Tunable Afterglow Luminescence and Triple-mode Emissions of Thermally Activated Carbon Dots Confined within Nanoclay**

*Yuchen Deng, Peng Li\*, Haiyan Jiang, Xu Ji and Huanrong Li\**

*National-Local Joint Engineering Laboratory for Energy Conservation in Chemical Process Integration and Resources Utilization, Tianjin Key Laboratory of Chemical Process Safety, School of Chemical Engineering and Technology, Hebei University of Technology, GuangRong Dao 8, Hongqiao District, Tianjin 300130, P. R. China.*

*E-mail: lihuanrong@hebut.edu.cn.*

## Materials and Methods

The layered clay (Laponite® RD) was purchased from Rockwood Additives Ltd. Pyridine-2,6-dicarboxylic acid (DPA), 2,4-pyridinedicarboxylic acid, 2,5-pyridinedicarboxylic acid, 3,4-pyridinedicarboxylic acid, 3,5-pyridinedicarboxylic acid, isophthalic acid, 2,2'-Bipyridine and propionic acid were purchased from J&K Scientific Ltd and were used as received. Sodium bicarbonate ( $\text{NaHCO}_3$ ) were obtained from Tianjin Chemical Reagent Co.

### Preparation of $(\text{DPA})_n@\text{clay}$ :

Laponite® (1.0 g) was dispersed in distilled water (10 mL) and was sonicated for 10 min to obtain a transparent colloidal suspension solution. A wet gel was obtained after centrifugating and washing with distilled water for two times. Subsequently, DPA (0.2 g) was dissolved in 20 mL distilled water with a moderate amount of  $\text{NaHCO}_3$  to adjust the pH to 7-8. Then  $(\text{DPA})_n@\text{clay}$  nanocomponents were obtained through centrifugating, washing and drying processes.<sup>1, 2</sup>

### Preparation of $\text{CDs}@\text{clay}$ :

The as-prepared  $(\text{DPA})_n@\text{clay}$  were placed into a muffle furnace and annealed at 550 °C for 2 h in air. The final product was donated as  $\text{CDs}@\text{clay}$ .

### Preparation of $\text{CDs-1}@\text{clay} \sim \text{CDs-6}@\text{clay}$ :

The preparation process was similar to  $\text{CDs}@\text{clay}$ . But the guest molecules were instead by 2,4-pyridinedicarboxylic acid, 2,5-pyridinedicarboxylic acid, 3,4-pyridinedicarboxylic acid, 3,5-pyridinedicarboxylic acid, isophthalic acid and 2,2'-Bipyridine. The above products were placed into a muffle furnace and annealed at 550 °C for 2 h in air. The final products were donated as  $\text{CDs-1}@\text{clay} \sim \text{CDs-6}@\text{clay}$ , respectively.

### Physical measurements:

The steady-state fluorescence/afterglow spectra and afterglow decay curves were measured on an Edinburgh FLSP920 fluorescence spectrophotometer equipped with a xenon arc lamp (Xe900) and a microsecond flash-lamp (F900), respectively. The luminescent photos and videos were taken by a Canon PowerShot SX540 HS camera at room temperature. X-Ray diffraction data were recorded on a Bruker D8

diffractometer with Cu-K $\alpha$  radiation. X-ray photoelectron spectroscopy (XPS) was carried out on Perkin Elmer PHI-1600 spectrometer. Transmission electron microscopy (TEM) observations were performed on a Tecnai G2 F20 microscope.  $^{29}\text{Si}$  solid-state NMR spectrum was recorded on Agilent 600 MHz DD2 spectrometer operating at 600 MHz.

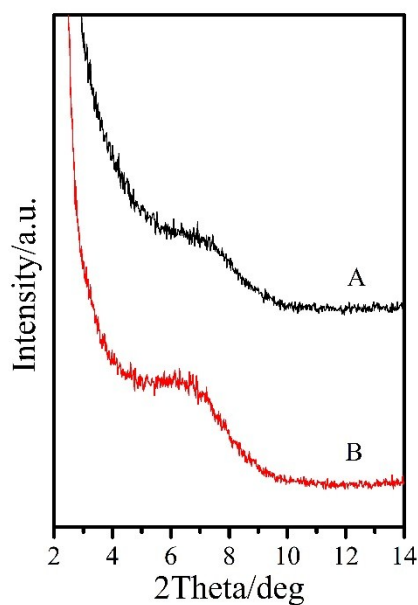

**Figure S1.** XRD patterns of A) the pristine clay, B) (DPA)<sub>n</sub>@clay.

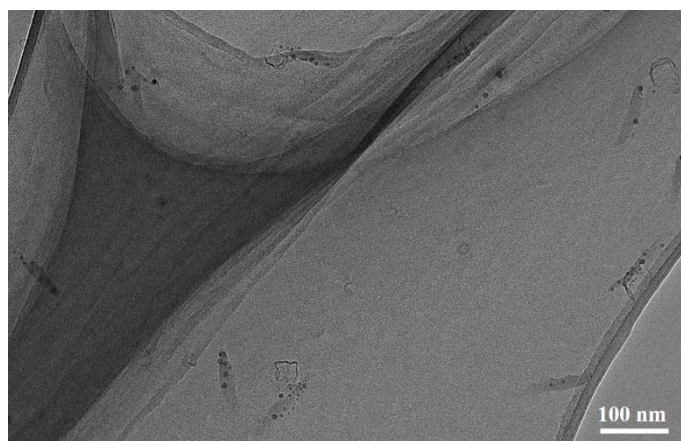

**Figure S2.** TEM image of CDs@clay.

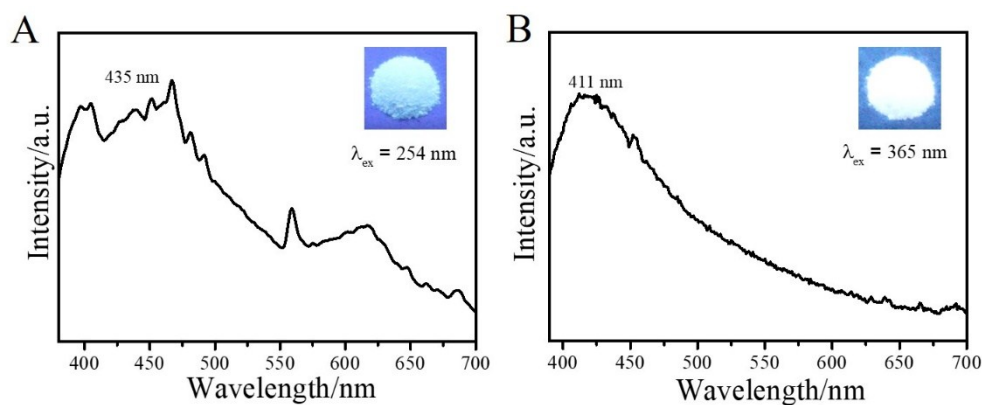

**Figure S3.** Fluorescence emission spectra of CDs@clay excited at A) 254 nm and B) 365 nm. Inset: Digital photographs of CDs@clay under UV light.

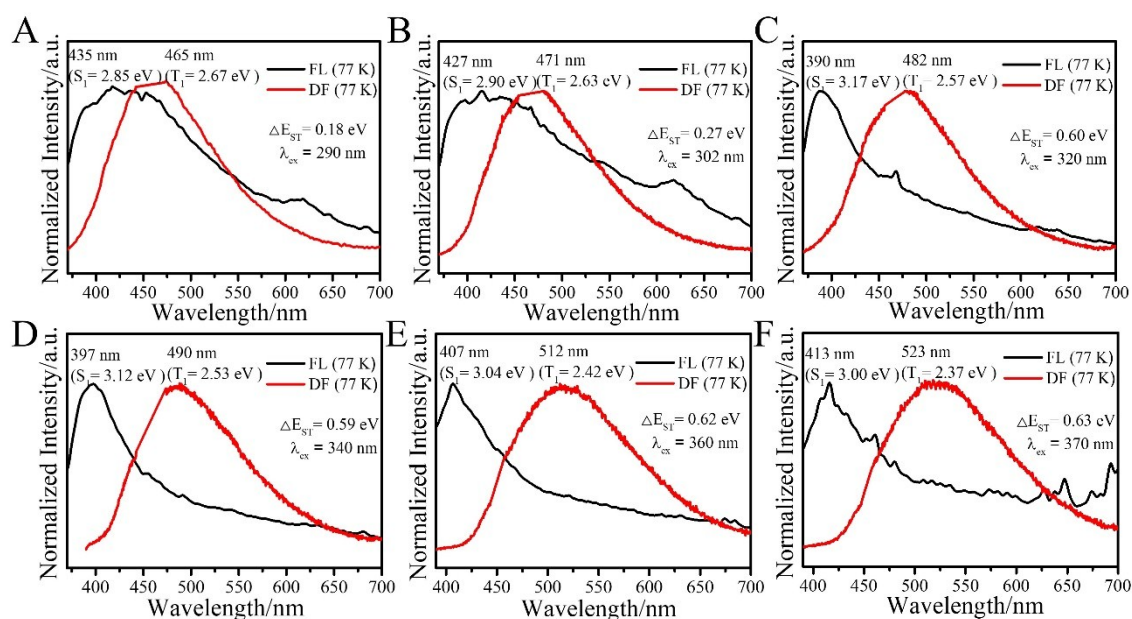

**Figure S4.** Normalized FL and DF/RTP emission spectra of the CDs@clay at low temperature (77 K) under excitation at A) 290 nm, B) 302 nm, C) 320 nm, D) 340 nm, E) 360 nm and F) 370 nm.

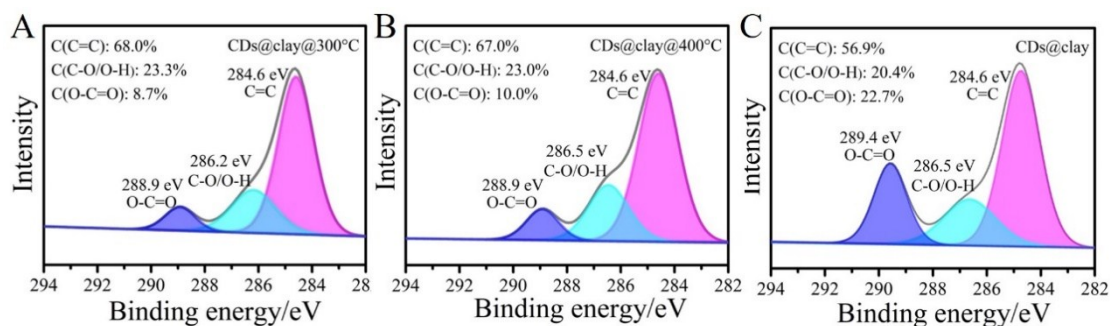

**Figure S5.** High-resolution XPS fitting results for the C 1s spectra of A) CDs@clay@300 °C, B) CDs@clay@400 °C and C) CDs@clay.

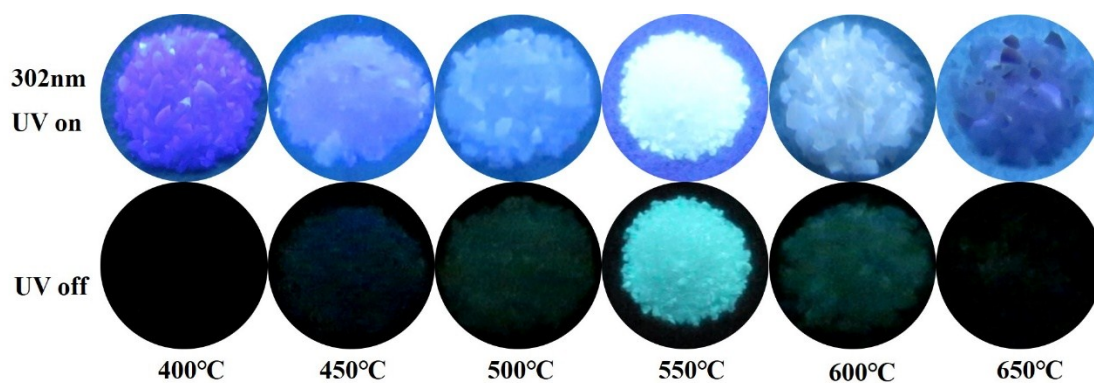

**Figure S6.** Digital photographs of  $(\text{DPA})_n@\text{clay}$  after thermal-treatment at different temperatures before and after turning off the UV excitation under 302 nm.

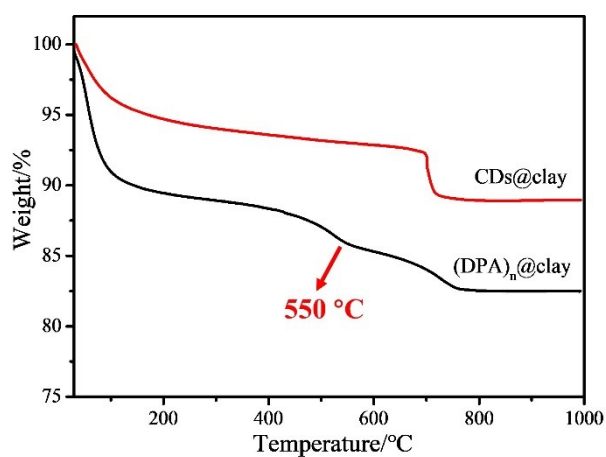

**Figure S7.** TGA curves of  $(\text{DPA})_n@\text{clay}$  and  $\text{CDs}@\text{clay}$ .

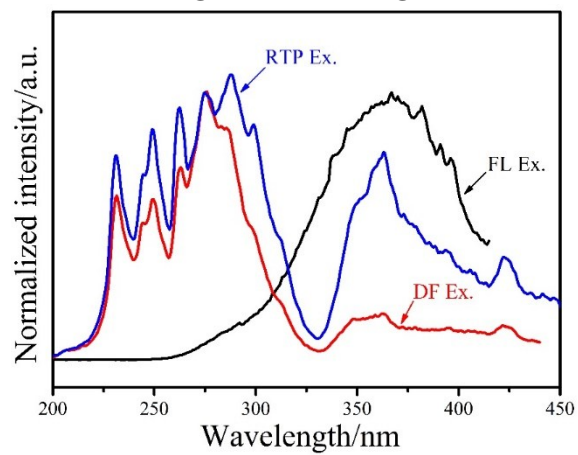

**Figure S8.** FL excitation spectrum (black), DF excitation spectrum (red), and RTP excitation spectrum (blue) of  $\text{CDs}@\text{clay}$ . All measurements were performed at room temperature.

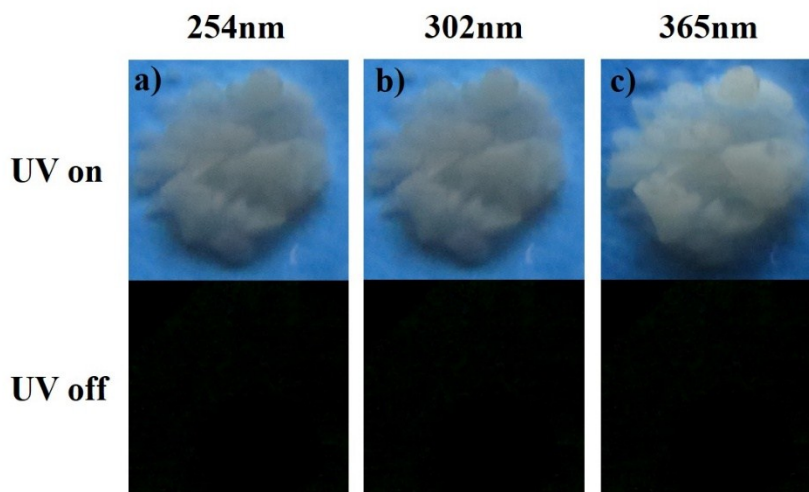

**Figure 9.** Digital photographs of (propionic acid)<sub>n</sub>@clay before and after turning off the UV excitation of a) 254 nm, b) 302 nm, c) 365 nm.

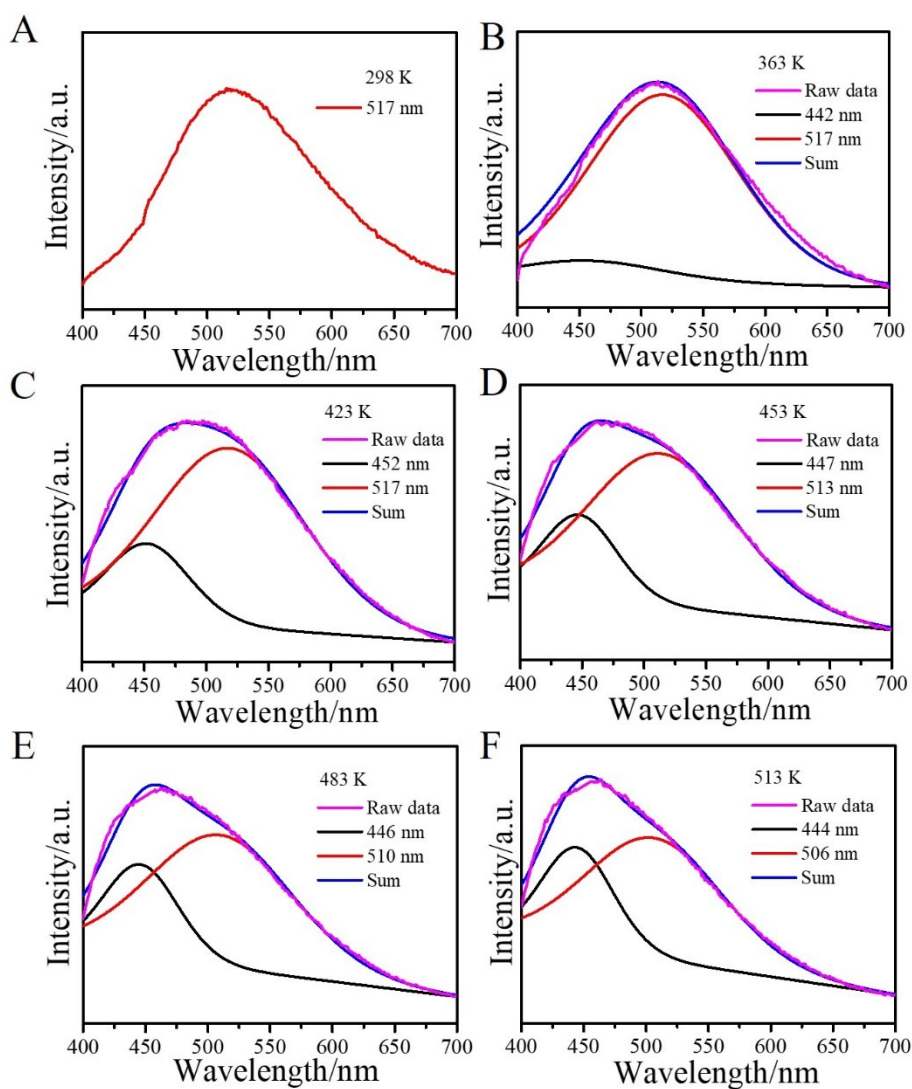

**Figure S10.** A-F) The afterglow emission spectra of CDs@clay at different



temperatures and the Gaussian fitted by two emission peaks.

**Table S1.** The relative contents of the two peaks for the CDs@clay.

| T [K] | $\lambda_{em}[nm]$ | B <sub>1</sub> [%] | $\lambda'_{em}[nm]$ | B <sub>2</sub> [%] |
|-------|--------------------|--------------------|---------------------|--------------------|
| 298   | -                  | -                  | 517                 | 100                |
| 363   | 442                | 9.80               | 517                 | 90.20              |
| 423   | 452                | 19.49              | 517                 | 80.51              |
| 453   | 447                | 21.26              | 513                 | 78.74              |
| 483   | 446                | 26.85              | 510                 | 73.51              |
| 513   | 444                | 30.24              | 506                 | 69.76              |

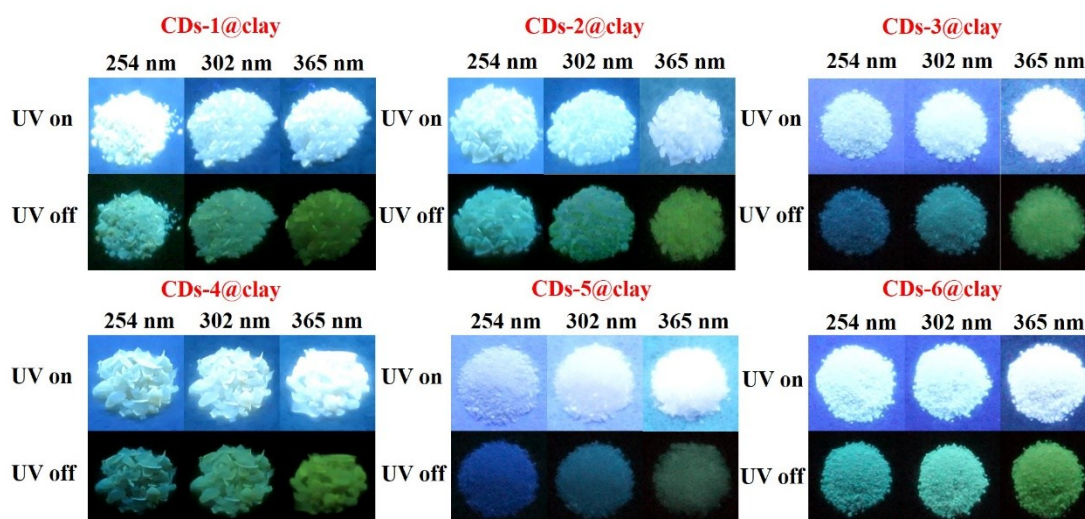

**Figure S11.** Digital photographs of CDs-1@clay ~ CDs-6@clay (2,4-pyridinedicarboxylic acid, 2,5-pyridinedicarboxylic acid, 3,4-pyridinedicarboxylic acid 3,5-pyridinedicarboxylic acid, isophthalic acid and 2,2'-Bipyridine as guest molecules, respectively) before and after turning off the UV excitation under ambient conditions and air atmosphere.

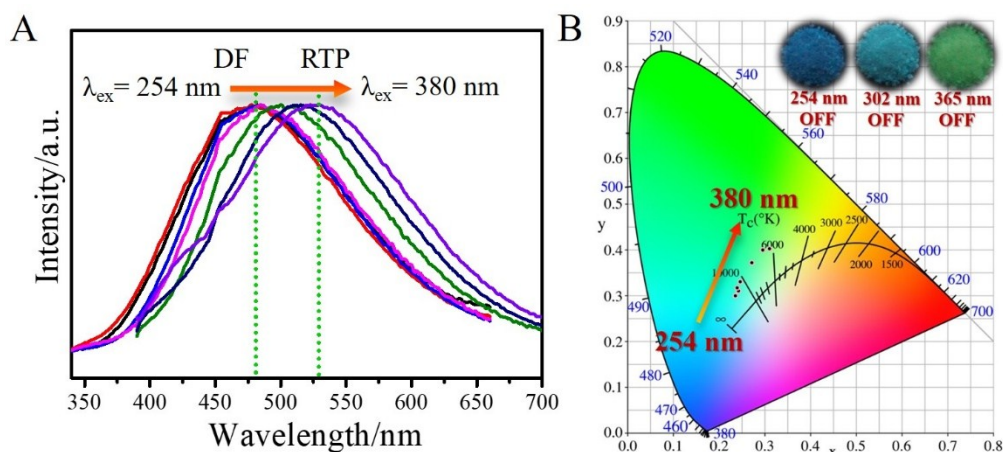

**Figure S12.** A) Afterglow emission spectra of CDs-3@clay (3,4-pyridinedicarboxylic acid as guest molecules) under different excitation wavelengths. B) CIE coordinate diagram of CDs-3@clay (3,4-pyridinedicarboxylic acid as guest molecules) under different excitation wavelengths.

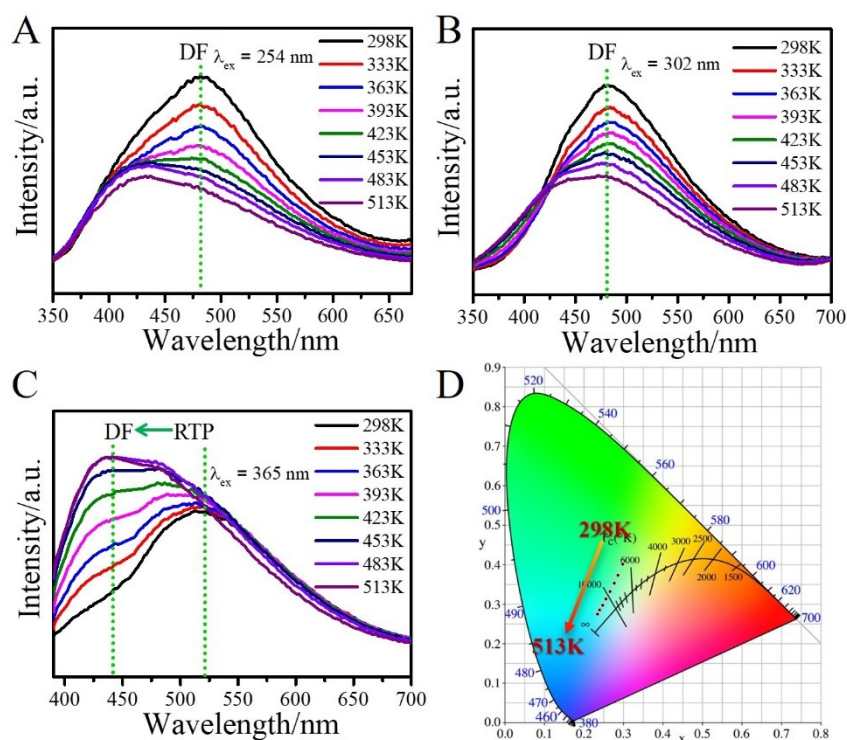

**Figure S13.** Afterglow emission spectra of CDs-3@clay (3,4-pyridinedicarboxylic acid as guest molecules) at different temperatures under A) 254 nm, B) 302 nm and C) 365 nm excitation. D) CIE coordinate diagram of CDs-3@clay (3,4-pyridinedicarboxylic acid as guest molecules) at different temperatures under 365 nm excitation.



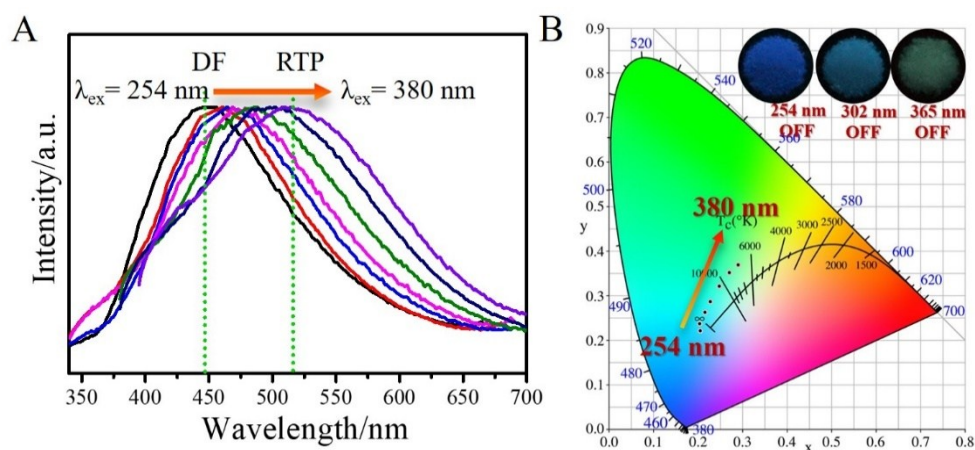

**Figure S14.** A) Afterglow emission spectra of CDs-5@clay (isophthalic acid as guest molecules) under different excitation wavelengths. B) CIE coordinate diagram of CDs-5@clay (isophthalic acid as guest molecules) under different excitation wavelengths.

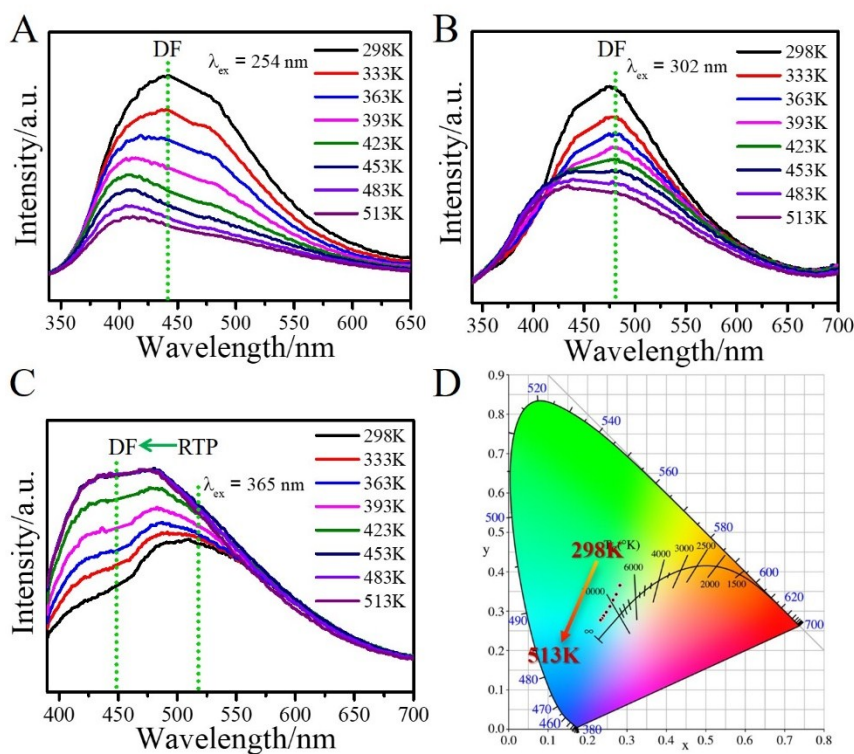

**Figure S15.** Afterglow emission spectra of CDs-5@clay (isophthalic acid as guest molecules) at different temperatures under A) 254 nm, B) 302 nm and C) 365 nm excitation. D) CIE coordinate diagram of CDs-3@clay CDs-5@clay (isophthalic acid as guest molecules) at different temperatures under 365 nm excitation.

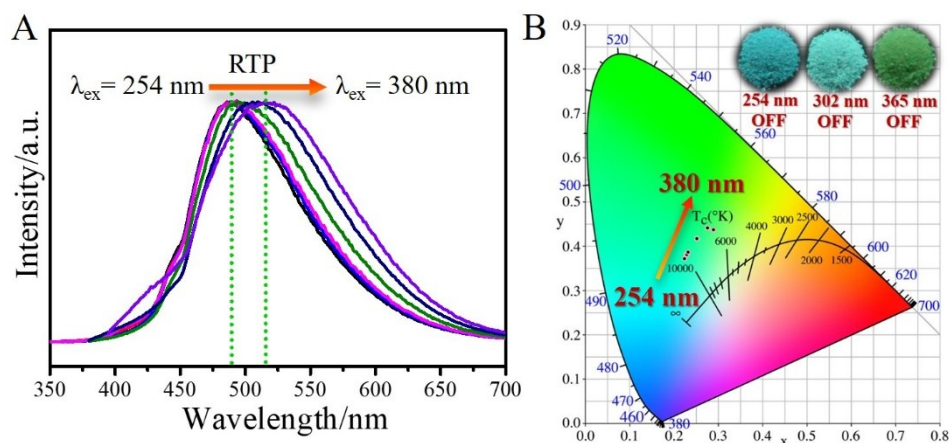

**Figure S16.** A) Afterglow emission spectra of CDs-6@clay (2,2'-Bipyridine as guest molecules) under different excitation wavelengths. B) CIE coordinate diagram of CDs-6@clay (2,2'-Bipyridine as guest molecules) under different excitation wavelengths.

**Table S2.** The photophysical characteristics of CDs-6@clay (2,2'-Bipyridine as guest molecules) at the low temperature (77 K) under different excitation wavelengths.

| Excitation wavelength | 254 nm  | 280 nm  | 302 nm  | 320 nm  | 340 nm  | 360 nm  | 370 nm  |
|-----------------------|---------|---------|---------|---------|---------|---------|---------|
| Fluorescence          | 398 nm  | 408 nm  | 413 nm  |
| Afterglow             | 482 nm  | 482 nm  | 484 nm  | 484 nm  | 496 nm  | 508 nm  | 513 nm  |
| $\Delta E_{ST}$       | 0.54 eV | 0.54 eV | 0.55 eV | 0.55 eV | 0.62 eV | 0.60 eV | 0.59 eV |

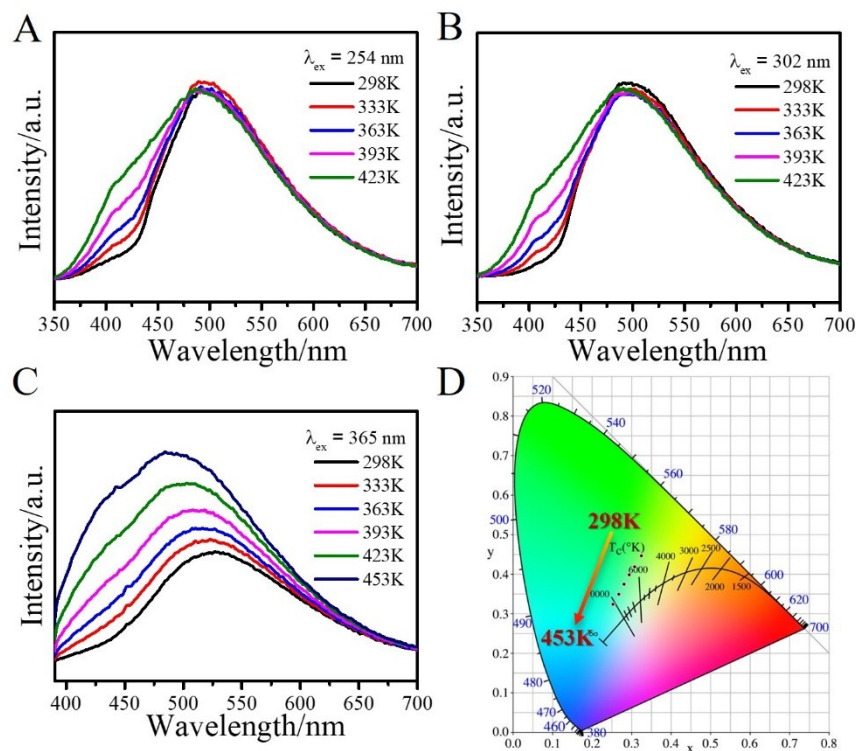

**Figure S17.** Afterglow emission spectra of CDs-6@clay (2,2'-Bipyridine as guest molecules) at different temperatures under A) 254 nm, B) 302 nm and C) 365 nm excitation. D) CIE coordinate diagram of CDs-3@clay CDs-6@clay (2,2'-Bipyridine as guest molecules) at different temperatures under 365 nm excitation.

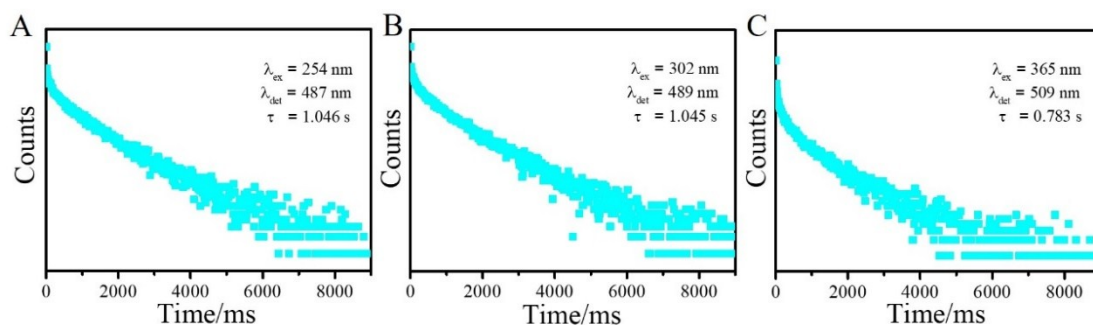

**Figure S18.** A-C) Afterglow decay curves of CDs-6@clay (2,2'-Bipyridine as guest molecules) under excitation at 254 nm, 302 nm and 365 nm.

**Table S3.** Afterglow lifetimes of CDs-6@clay (2,2'-Bipyridine as guest molecules) under different excitation wavelengths.

| Excitation | $\tau_1/s$ | $\tau_2/s$ | Average $\langle\tau\rangle/s$ | $\chi^2$ |
|------------|------------|------------|--------------------------------|----------|
|------------|------------|------------|--------------------------------|----------|

| wavelength |                 |                 |       |       |
|------------|-----------------|-----------------|-------|-------|
| 254 nm     | 0.419 (22.68 %) | 1.230 (77.32%)  | 1.046 | 1.298 |
| 302 nm     | 0.391 (17.26 %) | 1.182 (82.74 %) | 1.045 | 1.378 |
| 365 nm     | 0.197 (26.64 %) | 0.996 (73.36 %) | 0.783 | 1.186 |

## References

1. D. Yang, Y. Wang, Y. Wang, Z. Li, H. Li, *ACS Appl. Mater. Interfaces*, **2015**, 7, 2097.
2. P. Li, Z. Li, H. Li, *Adv. Opt. Mater.*, **2016**, 4, 156.
