# Supplementary figures and images for: Tunable afterglow luminescence and triple-mode emissions of thermally activated carbon dots confined within nanoclays
Source: Royal Society of Chemistry journal article supplement (doi:10.1039/c9tc04863d), 2019-01-01

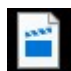

CDs@clay@254n  
m.mp4

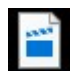

CDs@clay@302n  
m.mp4

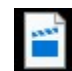

CDs@clay@365n  
m.mp4

Supplement: c9tc04863d2.pdf [file c9tc04863d2.pdf]
